# Supplementary material for: Attack Vulnerability of Network Controllability
Source: PubMed Central journal article supplement (PMC5010274; doi:10.1371/journal.pone.0162289), 2016-09-02
Supplement: pone.0162289.s001.pdf [file pone.0162289.s001.pdf]

Table S1: Real networks analyzed in this paper.

| Type                | Name                      | $N$    | $L$     | Description                                                |
|---------------------|---------------------------|--------|---------|------------------------------------------------------------|
| Regulatory          | TRN-Yeast-1 [1]           | 4,441  | 12,873  | Transcriptional regulatory network of <i>S. cerevisiae</i> |
|                     | TRN-Yeast-2 [2]           | 688    | 1,079   | Same as above (compiled by different group)                |
|                     | TRN-EC-2 [2]              | 418    | 519     | Transcriptional regulatory network of <i>E. coli</i>       |
| Trust               | Ownership-USCrop [3]      | 7,253  | 6,726   | Ownership network of US corporations                       |
|                     | College student [4, 5]    | 32     | 96      | Social networks of positive sentiment (college students)   |
|                     | Prison inmate [4, 5]      | 67     | 182     | Same as above (prison inmates)                             |
|                     | WikiVote [6]              | 7,115  | 103,689 | Who-vote-whom network of Wikipedia users                   |
| Food web            | Ythan [7]                 | 135    | 601     | Food Web in Ythan Estuary                                  |
|                     | Little Rock [8]           | 183    | 2,494   | Food Web in Little Rock lake                               |
|                     | Grassland [7]             | 88     | 137     | Food Web in Grassland                                      |
|                     | Seagrass [9]              | 49     | 226     | Food Web in St. Marks Seagrass                             |
| Metabolic           | <i>E. coli</i> [10]       | 2,275  | 5,763   | Metabolic network of <i>E. coli</i>                        |
|                     | <i>S. cerevisiae</i> [10] | 1,511  | 3,833   | Metabolic network of <i>S. cerevisiae</i>                  |
|                     | <i>C. elegans</i> [10]    | 1,809  | 1,303   | Metabolic network of <i>C. elegans</i>                     |
| Electronic circuits | s838 [2]                  | 512    | 819     | Electronic sequential logic circuit                        |
|                     | s420 [2]                  | 252    | 399     | Same as above                                              |
|                     | s208 [2]                  | 122    | 189     | Same as above                                              |
| Neuronal            | <i>C. elegans</i> [11]    | 297    | 2,345   | Neural network of <i>C. elegans</i>                        |
| WWW                 | Political blogs [12]      | 1,224  | 19,025  | Hyperlinks between weblogs on US politics                  |
| Internet            | p2p-1 [13, 14]            | 10,876 | 39,994  | Gnutella peer-to-peer file sharing network                 |
|                     | p2p-2 [13, 14]            | 8,846  | 31,839  | Same as above (at different time)                          |
|                     | p2p-3 [13, 14]            | 8,717  | 31,525  | Same as above (at different time)                          |
| Organizational      | Consulting [15]           | 46     | 879     | Social network from a consulting company                   |
|                     | Manufacturing [15]        | 77     | 2,228   | Social network from a manufacturing company                |
|                     | University [16]           | 81     | 817     | Social network among faculty members at a UK university    |

All the networks are directed; for each network, we show its type, name and reference; number of nodes ( $N$ ) and edges ( $L$ ); and brief description.

## References

- [1] Balaji S, Babu MM, Iyer LM, Luscombe NM, Aravind L. Comprehensive analysis of combinatorial regulation using the transcriptional regulatory network of yeast. *Journal of molecular biology*. 2006;360(1):213–227.
- [2] Milo R, Shen-Orr S, Itzkovitz S, Kashtan N, Chklovskii D, Alon U. Network motifs: simple building blocks of complex networks. *Science*. 2002;298(5594):824–827.
- [3] Norlen K, Lucas G, Gebbie M, Chuang J. EVA: Extraction, visualization and analysis of the telecommunications and media ownership network. In: *Proceedings of International Telecommunications Society 14th Biennial Conference (ITS2002)*, Seoul Korea. Citeseer; 2002.
- [4] Milo R, Itzkovitz S, Kashtan N, Levitt R, Shen-Orr S, Ayzenshtat I, et al. Superfamilies of evolved and designed networks. *Science*. 2004;303(5663):1538–1542.
- [5] Van Duijn MA, Zeggelink EP, Huisman M, Stokman FN, Wasseur FW. Evolution of sociology freshmen into a friendship network. *Journal of Mathematical Sociology*. 2003;27(2-3):153–191.
- [6] Leskovec J, Huttenlocher D, Kleinberg J. Signed networks in social media. In: *Proceedings of the SIGCHI Conference on Human Factors in Computing Systems*. ACM; 2010. p. 1361–1370.
- [7] Dunne JA, Williams RJ, Martinez ND. Food-web structure and network theory: the role of connectance and size. *Proceedings of the National Academy of Sciences*. 2002;99(20):12917–12922.
- [8] Martinez ND. Artifacts or attributes? Effects of resolution on the Little Rock Lake food web. *Ecological Monographs*. 1991; p. 367–392.
- [9] Christian RR, Luczkovich JJ. Organizing and understanding a winters seagrass foodweb network through effective trophic levels. *Ecological Modelling*. 1999;117(1):99–124.
- [10] Jeong H, Tombor B, Albert R, Oltvai ZN, Barabási AL. The large-scale organization of metabolic networks. *Nature*. 2000;407(6804):651–654.
- [11] Achacoso TB, Yamamoto WS. *AY’s Neuroanatomy of C. elegans for Computation*. CRC Press; 1991.
- [12] Adamic LA, Glance N. The political blogosphere and the 2004 US election: divided they blog. In: *Proceedings of the 3rd international workshop on Link discovery*. ACM; 2005. p. 36–43.
- [13] Leskovec J, Kleinberg J, Faloutsos C. Graphs over time: Densification and shrinking diameters. In: *ACM Transactions on Knowledge Discovery from Data (ACM TKDD)*. Citeseer;
- [14] Ripeanu M, Foster I, Iamnitchi A. Mapping the gnutella network: Properties of large-scale peer-to-peer systems and implications for system design. *arXiv preprint cs/0209028*. 2002;
- [15] Cross R, Parker A, Christensen CM, Anthony SD, Roth EA. *The hidden power of social networks*. Audio-Tech Business Book Summaries, Incorporated; 2004.
- [16] Nepusz T, Petróczy A, Négyessy L, Bazsó F. Fuzzy communities and the concept of bridgeness in complex networks. *Physical Review E*. 2008;77(1):016107.
